# Supplementary material
Source: PubMed Central journal article supplement (PMC6282220)
Supplement: Supplemental_material1.pdf [file Supplemental_material1.pdf]

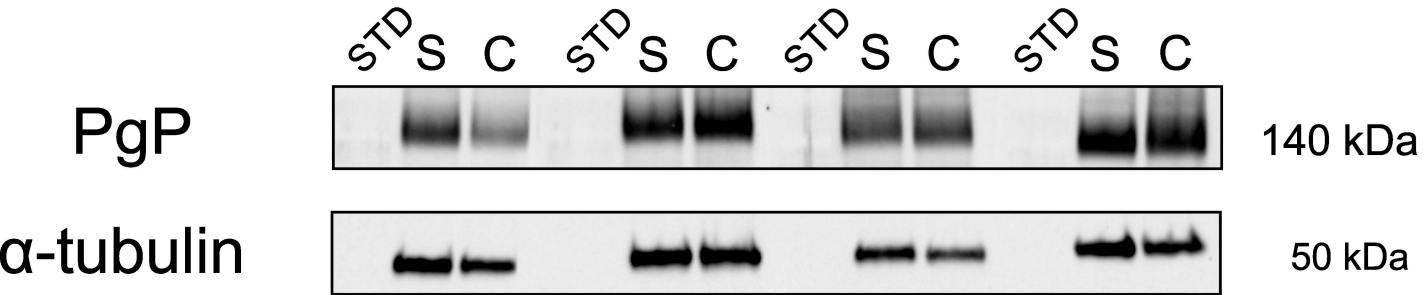

Supplementary Figure 1. Relative amount of P-glycoprotein (PgP) in microvessel isolates from saline-injected (control) and  $\lambda$  carrageenan-injected animals. Each sample is a pool of microvessels from 3 animals. Total animals represented = 12/treatment.
